# Supplementary material for: A lymphodepleted non‐human primate model for the assessment of acute on‐target and off‐tumor toxicity of human chimeric antigen receptor‐T cells
Source: PubMed Central journal article supplement (PMC8175993; doi:10.1002/cti2.1291), 2021-06-03
Supplement: CTI2-10-e1291-s001.pdf [file CTI2-10-e1291-s001.pdf]

|        |                                                                |     |
|--------|----------------------------------------------------------------|-----|
| MACACA | MELRALLCWAASLAAALEETLLNNTKLETADLKWVTFPQVDGQWEELSGLDEEQHSVRTYEV | 60  |
| _HUMAN | MELRVLLCWAASLAAALEETLLNNTKLETADLKWVTFPQVDGQWEELSGLDEEQHSVRTYEV |     |
| MACACA | CDVQRAPGQAHWLRGTGWVPRRGAVHVYATLRFTMLECLSLPRAGRCKETFTTVFYYESDA  | 120 |
| _HUMAN | CDVQRAPGQAHWLRGTGWVPRRGAVHVYATLRFTMLECLSLPRAGRCKETFTTVFYYESDA  |     |
| MACACA | DTATALTPAWMENPYIKVDTVAAEHLTRKRPGAEATGKVNKTLRLGPLSKAGFYLAQD     | 180 |
| _HUMAN | DTATALTPAWMENPYIKVDTVAAEHLTRKRPGAEATGKVNKTLRLGPLSKAGFYLAQD     |     |
| MACACA | QGACMALLSLHLFYKKAQLTVNLTRFPETVPRELVVPVAGSCVVDVAVPAPGSPSPSLYCR  | 240 |
| _HUMAN | QGACMALLSLHLFYKKAQLTVNLTRFPETVPRELVVPVAGSCVVDVAVPAPGSPSPSLYCR  |     |
| MACACA | EDGQWAEQPVTCGSCAPGFEEAEGNTKCRACAQGTFFKPLSGEGSCQPCPANSHSNNIGSA  | 300 |
| _HUMAN | EDGQWAEQPVTCGSCAPGFEEAEGNTKCRACAQGTFFKPLSGEGSCQPCPANSHSNTIGSA  |     |
| MACACA | VCQCRIGYFRARTDPRGAPCTTPPSAPRSVVSRLNGSSLHLEWSAPLESGGREDLTYALR   | 360 |
| _HUMAN | VCQCRVGYFRARTDPRGAPCTTPPSAPRSVVSRLNGSSLHLEWSAPLESGGREDLTYALR   |     |
| MACACA | CRECRPGGSCAPCGDLTFDGPGRDLVEPWVVVRGLRPDFTYTFEVTALNGVSSLATGPV    | 420 |
| _HUMAN | CRECRPGGSCAPCGDLTFDGPGRDLVEPWVVVRGLRPDFTYTFEVTALNGVSSLATGPV    |     |
| MACACA | PFEPVNVTTDREVPPAVSDIRVTRSSPSSLSLAWAVPRAPSGAVLDYEVKYHEKGAEGPS   | 480 |
| _HUMAN | PFEPVNVTTDREVPPAVSDIRVTRSSPSSLSLAWAVPRAPSGAVLDYEVKYHEKGAEGPS   |     |
| MACACA | SVRFLKTSENRAELRGLKRGASYLVQVRARSEAGYGPFGQEHHSQTQLDENEGWREQLAL   | 540 |
| _HUMAN | SVRFLKTSENRAELRGLKRGASYLVQVRARSEAGYGPFGQEHHSQTQLDESEGWREQLAL   |     |
| MACACA | IAGTAVVGVLVVLVIVVAVLCLRKQSNGREAEYSKHKGYLIGHGTVKYIDPFTYEDPN     | 600 |
| _HUMAN | IAGTAVVGVLVVLVIVVAVLCLRKQSNGREAEYSKHKGYLIGHGTVKYIDPFTYEDPN     |     |
| MACACA | EAVREFAKEIDVSYVKIEEVI GAGEFGEVCRGRLKAPGKKECVAIKTLKGGYTERQRRE   | 660 |
| _HUMAN | EAVREFAKEIDVSYVKIEEVI GAGEFGEVCRGRLKAPGKKECVAIKTLKGGYTERQRRE   |     |
| MACACA | FLSEASIMGQFEHPNIIRLEGVVTNSMPVMILTEFMENGALDSFLRLNDGQFTVIQLVGM   | 720 |
| _HUMAN | FLSEASIMGQFEHPNIIRLEGVVTNSMPVMILTEFMENGALDSFLRLNDGQFTVIQLVGM   |     |
| MACACA | LRGIASGMRYLAEMSYVHRDLAARNILVNSNLVCKVSDFGLSRFLEENSSDPTYTSSLGG   | 780 |
| _HUMAN | LRGIASGMRYLAEMSYVHRDLAARNILVNSNLVCKVSDFGLSRFLEENSSDPTYTSSLGG   |     |
| MACACA | KIPIRWTAPEAIAFRKFTSASDAWSYGIWMWEVMSFGERPYWDMSNQDVINAIEQDYRLP   | 840 |
| _HUMAN | KIPIRWTAPEAIAFRKFTSASDAWSYGIWMWEVMSFGERPYWDMSNQDVINAIEQDYRLP   |     |
| MACACA | PPDCPTSLHQLMLDCWQKDRNARPRFPQVVSALDKMIRNPASLKI VARENGDLLRIGV    | 900 |
| _HUMAN | PPDCPTSLHQLMLDCWQKDRNARPRFPQVVSALDKMIRNPASLKI VARENGDLLRIGV    |     |
| MACACA | TLAGHQKKILASVQHMKSQAKPGAPGGTGGFTPQY 935                        |     |
| _HUMAN | TLAGHQKKILASVQHMKSQAKPGTPGGTGGFAPQY 935                        |     |

### Supplementary figure 1

Homology of the extracellular domain of human and cynomolgus EPHB4. Extracellular portion of EPHB4 amino acid sequence was highlighted in green (cynomolgus macaque; A0A2K5V953) and red (Homo Sapiens; P54760). Homology of the extracellular portion of human and cynomolgus EPHB4 was >99%.

**No Tx group (Male)**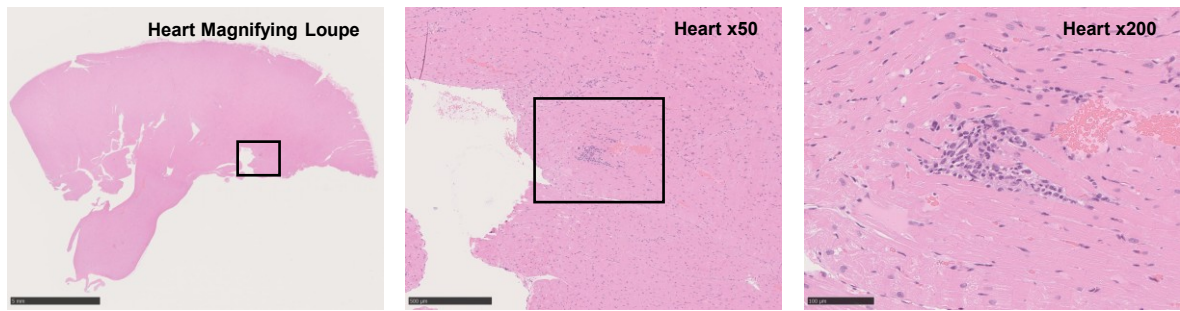**Supplementary figure 2**

Histological image of heart in PBMC group. The infiltration of mononuclear cells was detected.

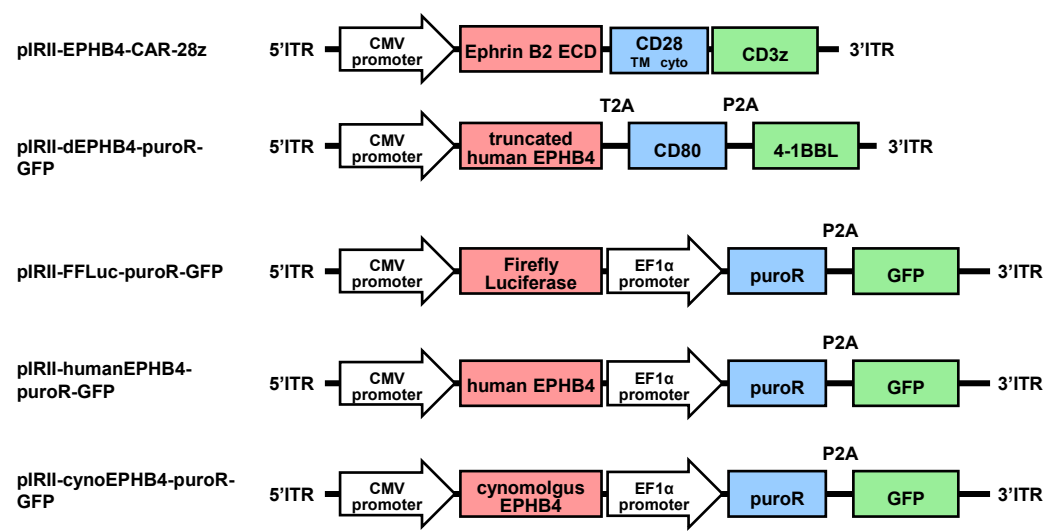

**Supplementary figure 3**

Transposon plasmids. ECD; Extra cellular domain, ITR; Inverted Tandem Repeat, puroR; puromycin resistant gene, GFP; Green fluorescent protein gene.

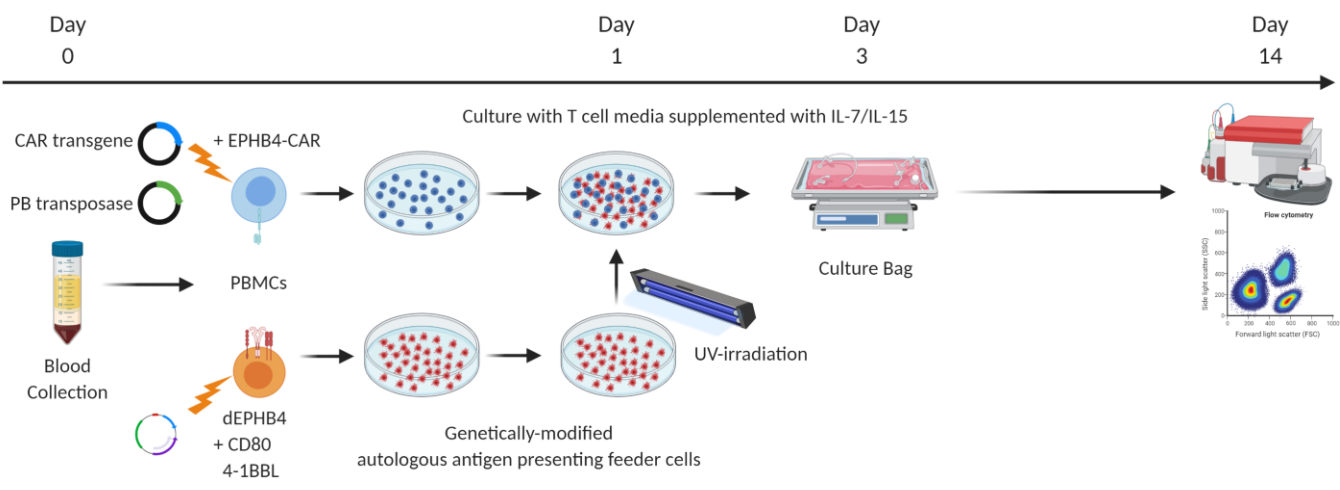

**Supplementary figure 4**

PB-EPHB4-CAR-T cell manufacturing scheme. Detailed manufacturing procedure was described in Materials and Methods.

## Hematology

| Parameters (Unit)      | n   | Min  | Max   |
|------------------------|-----|------|-------|
| HGB (g/dL)             | 525 | 10.8 | 15.9  |
| HCT (%)                | 525 | 35.1 | 51.1  |
| Retic ( $10^9/L$ )     | 525 | 11.9 | 115.4 |
| WBC ( $10^3/\mu L$ )   | 524 | 3.48 | 22.08 |
| Neut ( $10^3/\mu L$ )  | 518 | 0.47 | 11.27 |
| Mono ( $10^3/\mu L$ )  | 522 | 0.14 | 1.11  |
| Lymph ( $10^3/\mu L$ ) | 521 | 2.24 | 15.26 |
| PLT ( $10^3/\mu L$ )   | 525 | 157  | 595   |

## Biochemistry

| Parameters (Unit) | n   | Min   | Max   |
|-------------------|-----|-------|-------|
| AST (U/L)         | 901 | 13    | 81    |
| ALT (U/L)         | 902 | 8     | 122   |
| LDH (U/L)         | 780 | 141   | 581   |
| CK (U/L)          | 838 | 58    | 1316  |
| CRP (mg/dL)       | 93  | 0.01  | 0.64  |
| BIL (mg/dL)       | 905 | 0.03  | 0.31  |
| TP (g/dL)         | 505 | 6.30  | 8.82  |
| ALB (g/dL)        | 502 | 3.31  | 4.95  |
| UN (mg/dL)        | 913 | 10.1  | 32.3  |
| CRE (mg/dL)       | 911 | 0.47  | 1.01  |
| Na (mEq/L)        | 913 | 143.4 | 166.9 |
| K (mEq/L)         | 914 | 3.04  | 6.19  |

**Supplementary Table 1**

In-house data of blood examination. Two to four-years-old healthy cynomolgus macaques housed in Ina Research Inc. from 2016 to 2019 were subjected to a blood examination to obtain the reference values. The minimum and maximum values of each parameter were determined.

| Name                                           | clone      | Product# | Company     |
|------------------------------------------------|------------|----------|-------------|
| Goat anti Ephrin B2                            | polyclonal | AF496    | R&D SYSTEMS |
| PE anti-goat IgG Fc                            | polyclonal | F0107    | R&D SYSTEMS |
| APC anti CD3                                   | UCHT1      | 300412   | Biologend   |
| APC anti-CD8a                                  | HIT8a      | 300912   | Biologend   |
| FITC anti-CD4                                  | OKT4       | 317408   | Biologend   |
| FITC anti-CD45RA                               | HI100      | 304106   | Biologend   |
| APC anti-CCR7                                  | G043H7     | 353214   | Biologend   |
| Recombinant human Ephrin B2-Fc chimera protein | -          | 7397-EB  | R&D SYSTEMS |
| APC anti human IgG Fc                          | HP6017     | 409306   | Biologend   |

**Supplementary Table 2**

List of antibodies used in this study.

(Forward Primer) 5'-GACTACATGAACATGACTCCCCG-3'

(Reverse Primer) 5'-GTCCAAAACATCGTACTCCTCTCT-3'

(probe) 5' FAM-ACCCGCAAGCATTACCAGCCCT-TAMRA 3'

**Supplementary Table 3**

Primer and Probe set for the detection of EPHB4-CAR transgene.
